1           **Isolation and Genomic Characterization of *Desulfuromonas***  
2           ***soudanensis* WTL, a Metal- and Electrode-Reducing Bacterium**  
3           **from Anoxic Deep Subsurface Brine**

4  
5 Article type: Original Research

6  
7 Jonathan P. Badalamenti<sup>1</sup>, Zarath M. Summers<sup>1\*</sup>, Chi Ho Chan<sup>1</sup>, Jeffrey A. Gralnick<sup>1,2</sup>, and  
8 Daniel R. Bond<sup>1,2</sup> \*\*

9 <sup>1</sup> BioTechnology Institute, University of Minnesota – Twin Cities, Saint Paul, MN

10 <sup>2</sup> Department of Microbiology, University of Minnesota – Twin Cities, Minneapolis, MN

11  
12 \* Present address: ExxonMobil Research and Engineering Company, 1545 Route 22 East,  
13 Annandale, NJ 08801

14  
15 \*\*Correspondence:

16 256A Gortner Laboratory

17 1479 Gortner Avenue

18 Saint Paul, MN 55108 USA

19 Phone 612-624-8619

20 Email [dbond@umn.edu](mailto:dbond@umn.edu)

21  
22 Keywords: metal reduction, electrode, subsurface, *Desulfuromonas*, PacBio, complete genome

23  
24  
25 **ABSTRACT**

26 Reaching a depth of 713 m below the surface, the Soudan Underground Iron Mine (Soudan,  
27 Minnesota, USA) transects a massive Archaean (2.7 Ga) banded iron formation, providing a re-  
28 markably accessible window into the terrestrial deep biosphere. Despite carbon limitation, met-  
29 al-reducing microbial communities are present in potentially ancient anoxic brines continuously  
30 emanating from exploratory boreholes on Level 27. Using graphite electrodes deposited *in situ*  
31 as bait, we enriched and isolated a novel halophilic iron-reducing Deltaproteobacterium, *Desul-*  
32 *furomonas soudanensis* strain WTL, from an acetate-fed three-electrode bioreactor poised at  
33 +0.24 V (vs. standard hydrogen electrode). Cyclic voltammetry revealed that *D. soudanensis*  
34 releases electrons at redox potentials approximately 100 mV more positive than the model  
35 freshwater surface isolate *Geobacter sulfurreducens*, suggesting that its extracellular respiration  
36 is tuned for higher potential electron acceptors. *D. soudanensis* contains a 3,958,620-bp circular  
37 genome, assembled to completion using single-molecule real-time (SMRT) sequencing reads,  
38 which encodes a complete TCA cycle, 38 putative multiheme *c*-type cytochromes, one of which  
39 contains 69 heme-binding motifs, and a LuxI/LuxR quorum sensing cassette that produces an  
40 unidentified *N*-acyl homoserine lactone. Another cytochrome is predicted to lie within a putative  
41 prophage, suggesting that horizontal transfer of respiratory proteins plays a role in respiratory  
42 flexibility among metal reducers. Isolation of *D. soudanensis* underscores the utility of electrode-  
43 based approaches for enriching rare metal reducers from a wide range of habitats.

## Isolation and complete genome of *Desulfuromonas soudanensis*

### 47 INTRODUCTION

48

49 Microbial anaerobic respiration via metal reduction is a ubiquitous biogeochemical process in  
50 anoxic sediments and subsurface environments. Known metal reducers are found in several Bac-  
51 terial and Archaeal phyla, and are often recognizable by their genomic arsenal of redox proteins,  
52 such as multiheme *c*-type cytochromes, that are implicated in transferring respiratory electrons  
53 across insulating biological membranes and cell walls to extracellular metal oxide particles.  
54 Many metal-reducing bacteria can also grow as biofilms using poised electrodes as terminal elec-  
55 tron acceptors, a phenotype similar to the recently described phenomenon of syntrophic interspe-  
56 cies electron transfer (Rotaru et al., 2015). Because they can act as unlimited electron sinks, elec-  
57 trodes are powerful tools for enrichment of microorganisms capable of respiring extracellular  
58 acceptors. Mixed communities and pure cultures reducing electrodes have been obtained from  
59 habitats as diverse as wastewater sludge (Fu et al., 2013), freshwater and marine sediments  
60 (Bond et al., 2002; Holmes et al., 2004a; Miceli et al., 2012), soda lakes (Zavarzina et al., 2006),  
61 and deep subsurface fluids (Greene et al., 2009).

62

63 Along the southern edge of the Canadian shield, the Soudan Underground Mine in north-  
64 ern Minnesota (Figure 1A) transects the Archaean Animikie ocean basin (Ojakangas et al.,  
65 2001), with the main mineshaft providing access to 2.7 Gy-old banded iron deposits. On its low-  
66 est level (Level 27; 713 m depth), exploratory boreholes allow access to calcium- and metal-rich  
67 deep subsurface brines up to 3 times saltier than seawater, with low oxidation-reduction poten-  
68 tials, circumneutral pH levels, millimolar concentrations of reduced metals, and dissolved organ-  
69 ic carbon concentrations below detection (Edwards et al., 2006; Toner et al., in prep.). Boreholes  
70 in the Soudan Mine, whose porewaters contain evidence of lithoautotrophic metabolism (Ba-  
71 dalamenti et al., unpublished data), represent an opportunity to access a deep subsurface envi-  
72 ronment free of recent surface water contamination and photosynthetic inputs, in a region unper-  
73 turbed by volcanic or tectonic activity.

74

75 Here we describe isolation and phenotypic characterization of a metal-reducing subsur-  
76 face isolate, *Desulfuromonas soudanensis* WTL, enriched by *in situ* electrodes placed in a Sou-  
77 dan Mine borehole. Measurements of Fe(III) reduction and electron transfer rates indicate that  
78 this isolate's respiratory machinery is tuned for capturing energy from higher-potential electron  
79 acceptors than surface isolates. Its complete, circular chromosome is limited in cytochrome  
80 abundance compared to most described metal-reducing *Deltaproteobacteria* from surface sites or  
81 aquifers, and at least one of these cytochromes is embedded within a putative prophage, suggest-  
82 ing that virus-mediated horizontal gene transfer contributes to respiratory flexibility in the envi-  
83 ronment. The *D. soudanensis* genome encodes LuxI/LuxR quorum-sensing circuitry, and medi-  
84 um from *D. soudanensis* cultures activates an *N*-acyl-L-homoserine lactone (AHL)-sensing indi-  
85 cator strain (Zhu et al., 2003). These findings underscore the effectiveness of using microbial  
86 electrochemistry to obtain rare organisms from the deep terrestrial subsurface for reference ge-  
87 nome sequencing and physiological characterization.

88

### 89 MATERIALS AND METHODS

90

91 **Media and culture conditions.** Soudan Mine medium (SM-1X) used for enrichment and  
92 isolation contained the following (per liter of deionized water): CaCl<sub>2</sub> · 2H<sub>2</sub>O, 22.1 g; MgCl<sub>2</sub> ·  
93 6H<sub>2</sub>O, 15.3 g; NaCl, 15.8 g; MgSO<sub>4</sub> · 7H<sub>2</sub>O, 0.01 g; NH<sub>4</sub>Cl, 1.0 g; KH<sub>2</sub>PO<sub>4</sub>, 0.05 g; sodium ace-

## Isolation and complete genome of *Desulfuromonas soudanensis*

94 tate, 1.64 g; NaHCO<sub>3</sub>, 1.8 g; non-chelated trace minerals (Marsili et al., 2008), 10 ml; Wolfe's  
95 vitamins, 10 ml. SM-0.5X medium, used for characterization and routine growth of the pure cul-  
96 ture, contained half the concentration of chloride salts. When fumarate was the electron acceptor,  
97 fumaric acid was added to 40 mM final concentration and titrated to pH 6.0-6.1 with 50% (w/v)  
98 NaOH before adding other ingredients. When SM-0.5X medium was used for electrode-based  
99 growth of pure cultures, it contained 50 mM additional NaCl in lieu of fumarate. Fe(III)-reducing  
100 cultures contained either ferric citrate (55 mM), poorly crystalline iron oxide (~100 mM; Levar  
101 et al., 2014), or schwertmannite (~20 mM). Schwertmannite was prepared by addition of 5.2 ml  
102 30% H<sub>2</sub>O<sub>2</sub> to 1 l of 10 g/l FeSO<sub>4</sub> · 7H<sub>2</sub>O and stirred overnight, and was collected by centrifuga-  
103 tion followed by 3 rinses with deionized water. In all cases, Soudan Mine medium was prepared  
104 containing all ingredients except chloride salts and bicarbonate, brought to 0.7 times the final  
105 volume (i.e. 700 ml for 1 L), adjusted to pH 6.8 before adding NaHCO<sub>3</sub>, bubbled with oxygen-  
106 free 80:20 N<sub>2</sub>:CO<sub>2</sub> and autoclaved in butyl rubber-stoppered tubes or serum bottles. A separate  
107 salt solution containing 73.5 g CaCl<sub>2</sub> · 2H<sub>2</sub>O, 50.8 g MgCl<sub>2</sub> · 6H<sub>2</sub>O, and 52.6 g NaCl per liter  
108 was bubbled with Ar and autoclaved separately. Upon cooling, this salt solution was aseptically  
109 and anaerobically added to basal SM medium to achieve the desired final volume.

110  
111 ***In situ* electrode enrichment.** A ~40-cm length of Cu wire was threaded into glass tub-  
112 ing, and soldered to Pt wire near the end of the hollow tube. The glass was fused shut at either  
113 end, leaving a short length of Pt wire exposed so that electrodes could be attached to each end  
114 and so that the whole device could be autoclaved and incubated in the mine without any copper  
115 wire exposure (Fig. 1C). One Pt lead was connected to a ~25-cm<sup>2</sup> piece of graphite felt as the  
116 anode; the other was attached to an equal area of platinized carbon cloth (BASF Fuel Cell Co.,  
117 Somerset, NJ) as the cathode. To remove impurities, electrodes were soaked sequentially in 70%  
118 EtOH, 1 N HCl, and 1 N NaOH, with diH<sub>2</sub>O rinses in between prior to autoclaving. The sterile  
119 rod containing the anode was slid gently down diamond drill hole (DDH) 944, located along the  
120 West Drift of Level 27 of the Soudan Underground Mine (Soudan, MN, USA; 47°49'24" N,  
121 92°14'14" W) and held in place such that the cathode was exposed to the oxic opening of the  
122 borehole. After 2 months of incubation *in situ*, the anode was retrieved and small sections used to  
123 inoculate laboratory electrode enrichments as described below. Samples of DDH 944 borehole  
124 water were also brought to directly to the laboratory and used to inoculate reactors containing  
125 poised electrodes. However, out of 8 attempts (two separate sampling events), no laboratory re-  
126 actors produced current above background levels after up to 60 days of incubation.

127  
128 **Electrochemical methods.** Anode sections from *in situ* mine enrichments were trans-  
129 ferred to 100-ml glass cylindrical electrochemical cells (BASi, West Lafayette, IN) containing  
130 SM-1X electrode medium and 4 separate planar graphite electrodes (12 cm<sup>2</sup> total surface area), a  
131 Pt counter electrode, and an Ag/AgCl reference electrode as previously described (Marsili et al.,  
132 2008). Electrodes were poised at +0.24 V vs. standard hydrogen electrode (SHE) with a potenti-  
133 ostatic (Bio-Logic, Knoxville, TN) and bioreactors were incubated in a 20°C circulating water bath  
134 in the dark under constant magnetic stirring and flushing with humidified 80:20 N<sub>2</sub>:CO<sub>2</sub>  
135 scrubbed free of O<sub>2</sub>. Cyclic voltammograms (CVs) were collected at 1 mV/s scan rate with the  
136 second of two scans reported. CVs were compared to those of *G. sulfurreducens* (Chan et al.,  
137 2015) grown at 30°C as previously described (Marsili et al., 2008).

138  
139 **Isolation and cultivation.** Enrichments were serially diluted in SM-1X medium contain-  
140 ing 20 mM acetate and 100 mM Fe(III)-oxide, and the highest dilutions yielding Fe(II)-

## Isolation and complete genome of *Desulfuromonas soudanensis*

141 production at 24°C in the dark under an 80:20 N<sub>2</sub>:CO<sub>2</sub> atmosphere were diluted further in 40 mM  
142 fumarate-containing medium. High dilutions (10<sup>-6</sup>) were streaked for isolation with fumarate as  
143 the electron acceptor in an anaerobic glovebag (Coy Laboratory Products, Grass Lake, MI) on  
144 vitamin-free SM-0.5X medium solidified with 0.9% (w/v) Bacto agar (Difco) amended with 0.5  
145 mM cysteine, and incubated under a 75:20:5 N<sub>2</sub>:CO<sub>2</sub>:H<sub>2</sub> atmosphere in an anaerobic jar (Almore  
146 International, Beaverton, OR) containing a basket of Pt catalyst recharge pellets (Microbiology  
147 International, Frederick, MD). After 3 weeks of incubation at 24 °C, isolated pink colonies were  
148 picked into 0.5 ml SM-0.5X medium containing 0.5 mM cysteine and subsequently transferred  
149 into 10-ml culture tubes. Possible contamination was assessed by fluorescence microscopy of  
150 DAPI-stained cells and by plating aerobically on either unbuffered SM agar or LB agar and an-  
151 aerobically (75:20:5 N<sub>2</sub>:CO<sub>2</sub>:H<sub>2</sub>) on LB agar buffered with 1.8 g/l NaHCO<sub>3</sub>. SM-0.5X medium  
152 with 20 mM acetate and 40 mM fumarate was used for routine cultivation at 24°C. Growth with  
153 fumarate was determined by increase in OD<sub>600</sub> and Fe(III) reduction was measured by the Fer-  
154 roZine assay. Axenic cultures were stored at -80°C in 10% (v/v) dimethyl sulfoxide, and a clon-  
155 al population of revived *D. soudanensis* cells used to generate the genomic sequence was depos-  
156 ited in the German Collection of Microorganisms and Cell Cultures (DSMZ) as strain 101009.  
157 Because this enrichment survived unplanned oxygen exposures and temperature changes due to  
158 power outages, the isolate was dubbed strain WTL for “will to live.”  
159

160 **Electron donor utilization.** *D. soudanensis* cells grown with fumarate were inoculated  
161 (1:2 inoculum, as cells reached an OD<sub>600</sub> of ~0.25) into magnetically stirred conical bioreactors  
162 containing a single graphite electrode poised at +0.24 V at 24°C as described previously (Marsili  
163 et al., 2008). To remove residual acetate, the potentiostat was paused and spent growth medium  
164 replaced twice with donor-free medium under a constant stream of 80:20 N<sub>2</sub>:CO<sub>2</sub>. Electrodes  
165 were then re-poised at +0.24 V for at least 30 min to obtain a steady background current in the  
166 absence of donors. The following electron donors were tested individually to 5 mM final concen-  
167 tration unless noted: lactate, ethanol, methanol, formate, glycerol, pyruvate, citrate, succinate,  
168 propionate, butyrate, glucose (2 mM), and benzoate (0.25 mM). If a substrate yielded an increase  
169 above background current, after 2 h medium was replaced twice again before testing another  
170 substrate; otherwise, up to 3 substrates were added cumulatively before 5 mM acetate was added  
171 to re-establish current production.  
172

173 **Genome sequencing, assembly, and annotation.** 30 µg high MW genomic DNA  
174 (gDNA) was pooled from duplicate 10-ml stationary phase fumarate-grown cultures using a  
175 DNeasy Blood & Tissue kit (Qiagen). gDNA was quantified with Qubit (Life Technologies) and  
176 prepared for PacBio sequencing using standard 10-kb insert protocols. SMRT bell templates  
177 were size-selected at a 7-kbp cutoff using Blue Pippin electrophoresis (Sage Science). Long se-  
178 quencing reads were collected from a total of 8 SMRT cells (P4-C2 chemistry, 120-min movies)  
179 on a PacBio RS II instrument (Mayo Clinic, Rochester, MN) yielding 1.7 Gbp of raw data (mean  
180 read length 4,663 bp; N<sub>50</sub> 6,613 bp). Assembly was performed with HGAP v.3 (Chin et al.,  
181 2013) in SMRT Analysis v. 2.2 with a 10-kb minimum subread length to provide ~100× cover-  
182 age. Unambiguous circularity of the resulting ~4-Mbp contig was confirmed via dot plot  
183 (Gepard v. 1.30) and self-complementary ends were manually trimmed. A crude initial annota-  
184 tion was generated with Prokka v. 1.10 (Seemann, 2014) to locate a single copy of *dnaA* up-  
185 stream of several DnaA boxes predicted with Ori-Finder (Gao and Zhang, 2008). The manually  
186 reoriented contig was then polished using the entire PacBio dataset (~427× coverage) to QV > 50  
187 before a final polishing step with 100× coverage of 250-bp paired-end Illumina reads using bre-



## Isolation and complete genome of *Desulfuromonas soudanensis*

188 seq v. 0.26 (Deatherage and Barrick, 2014) followed by Pilon v. 1.10 (Walker et al., 2014). The  
189 final 3,958,620-bp assembly was uploaded for automated annotation via the IMG/ER pipeline  
190 (<https://img.jgi.doe.gov/cgi-bin/mer/main.cgi>). Putative multiheme *c*-type cytochromes ( $\geq 3$   
191 Cxx(x)CH motifs) were identified with a Python script (<https://github.com/bondlab/scripts>), and  
192 Demerec gene abbreviations were assigned based on bi-directional best hits between *D. sou-*  
193 *danensis* and *Geobacter sulfurreducens* PCA (GenBank accession no. NC\_002939.5) as identi-  
194 fied by GET\_HOMOLOGUES (2015-05-29 release) (Contreras-Moreira and Vinuesa, 2013) at  
195 30% identity and 90% query coverage. The manually curated IMG annotation was then submit-  
196 ted to GenBank (accession numbers provided below) to ensure consistency of genetic features  
197 across public databases.

198  
199 **Phylogenomic classification and genomic analyses.** FASTA nucleotide sequences for  
200 all publicly available *Desulfuromonas*, *Desulfuromusa*, *Geoalkalibacter*, *Geobacter*, *Geopsy-*  
201 *chrobater*, and *Pelobacter* genomes (26 total) were downloaded from NCBI or IMG/ER and ana-  
202 lyzed with PhyloSift v. 1.0.1 (Darling et al., 2014). A concatenated alignment of 40 conserved  
203 single-copy marker genes was used to generate an unrooted maximum likelihood tree in FigTree  
204 v. 1.4.0 with *Desulfovibrio vulgaris* Hildenborough as the outgroup.

205  
206 **Community analysis.** Community gDNA harvested from unenriched Soudan brine  
207 (DDH 944), and a scraped section of electrode-enriched biofilms was isolated using a PowerWa-  
208 ter Kit (Mo Bio, Carlsbad, CA). 16S rRNA genes were PCR amplified with phased V3-V4 pri-  
209 mers as described previously (Bartram et al., 2011) and sequenced with 150-bp paired-end Illu-  
210 mina reads on a HiSeq 2000 ( $>22\text{M}$  reads/sample). Raw reads were quality trimmed, filtered,  
211 merged, aligned, clustered at 97% identity, and taxonomically assigned using mothur (Schloss et  
212 al., 2009) against the SILVA release 115 reference database. In addition, merged reads were  
213 mapped to the full-length 16S rRNA gene of *D. soudanensis* using bowtie2 v. 2.2.6 and mapped  
214 read counts were extracted from the resulting SAM files.

215 **Nucleotide accession numbers.** Nucleotide sequence and annotation are available from  
216 GenBank (accession no. CP010802) and IMG/ER (GOLD analysis project Ga0069009). Raw  
217 reads and base modification data have been uploaded to the NCBI Sequence Read Archive under  
218 BioProject PRJNA272946.

## 219 220 RESULTS

221  
222 **Electrodes enrich rare taxa from subsurface brine.** To enrich potential metal reducers within  
223 Soudan Mine boreholes, carbon cloth anodes were placed in the anoxic zone and connected to  
224 platinized cathodes in the oxic zone  $\sim 40$  cm above, near the mouth of the borehole (Figure 1C).  
225 After 2 months of *in situ* incubation, 1 cm<sup>2</sup> anode subsamples were transferred under anaerobic  
226 conditions to laboratory reactors containing acetate and poised graphite electrodes (+0.24 V,  
227 20°C). Within 16 days, an exponential increase in anodic current, doubling every  $\sim 1$  day was ob-  
228 served, reaching a maximum of 92  $\mu\text{A}/\text{cm}^2$  (Figure 1D). Acetate addition after brief starvation  
229 periods immediately rescued current production (Figure 1D, red arrows), and transfer of scraped  
230 biofilm material from this initial enrichment to new reactors resulted in a similar growth pattern.

231  
232 Amplicons from bacterial V3-V4 16S rRNA regions were generated to compare DNA re-  
233 covered from the original borehole fluids with electrode-enriched communities. While *Deltapro-*  
234 *teobacteria* sequences were among the least abundant lineages ( $<0.2\%$ ) in native borehole (DDH

## Isolation and complete genome of *Desulfuromonas soudanensis*

235 944) brine, these sequences increased ~100-fold during laboratory electrode enrichments (20-  
236 22% relative abundance). In contrast, heterotrophic *Marinobacter* lineages were equally abundant  
237 in both native and enriched samples (Bonis and Gralnick, 2015). With successive transfers, a  
238 *Desulfuromonas* sequence present at <0.02% relative abundance in the original anoxic fluid  
239 samples grew to comprise nearly 100% of the electrode *Deltaproteobacteria*. Other lineages  
240 linked to metal reduction, such as *Acidobacteria* (Mehta-Kolte and Bond, 2012) and the Pepto-  
241 coccaceae family of *Firmicutes* (Wrighton et al., 2011) were also present in brines, but they were  
242 not enriched. Inoculating borehole water directly into laboratory reactors did not produce any  
243 current-producing enrichments ( $n = 8$ ).

244  
245 **Pure cultures of *D. soudanensis* grow on electrodes and reduce Fe(III).** An isolate  
246 was obtained from electrode enrichments by first diluting in Fe(III)-oxide medium, then plating  
247 using fumarate as the electron acceptor, and was named *Desulfuromonas soudanensis* strain  
248 WTL. This strain demonstrated 96% full-length 16S rRNA gene sequence identity to *Desulfu-*  
249 *romonas* sp. WB3 (enriched from a subsurface aquifer using As(V) as the electron acceptor; Os-  
250 borne et al., 2015), *D. carbonis* (enriched from a coal bed gas well using Fe(III); An and Picar-  
251 dal, 2015), and *D. michiganensis* (enriched from river sediment using tetrachloroethene; Sung et  
252 al., 2003) (GenBank accession nos. KM452745.1, KJ776405.2, and NR\_114607.1, respectively).  
253 Reads mapping with 100% identity to the 16S rRNA gene of the isolated *D. soudanensis* were  
254 present in the original DDH 944 brine DNA samples, albeit at extremely low relative abundance  
255 (data not shown). While original enrichments were conducted at 20°C and at salinities reflecting  
256 borehole conditions, *D. soudanensis* grew more rapidly at 24°C and at lower salt concentrations.  
257 These more favorable conditions were used for all subsequent characterization.

258  
259 The maximum doubling time of *D. soudanensis* pure cultures growing on poised elec-  
260 trodes (+0.24 V vs. SHE) was  $13.2 \pm 0.05$  h ( $n = 5$ ). Based on current densities ( $58 \pm 18$   $\mu\text{A}/\text{cm}^2$ ;  
261  $n = 6$ ), and attached protein levels ( $52 \pm 11$   $\mu\text{g}/\text{cm}^2$ ;  $n = 5$ ), the specific respiration rate of *D.*  
262 *soudanensis* was calculated to be  $1.03$   $\mu\text{A}/\mu\text{g}$  protein ( $\pm 0.06$ ;  $n = 5$ ). This current:protein ratio,  
263 which was significantly slower than the 2-4  $\mu\text{A}/\mu\text{g}$  ratios reported for *G. sulfurreducens* at vari-  
264 ous growth stages, agreed with the relatively slow doubling time of *D. soudanensis*. In addition,  
265 even with excess electron donor, biofilms reached a plateau at protein levels that suggested an  
266 inability to form multilayer biofilms on the electrode surface (10-20  $\mu\text{m}$  thick biofilms typically  
267 correspond to attached protein of  $\sim 500$   $\mu\text{g}/\text{cm}^2$ ; (Marsili et al., 2008).

268  
269 Cyclic voltammetry of *D. soudanensis* biofilms revealed a ~100-mV more positive shift  
270 in the potential triggering current flow from bacteria, as well as the midpoint, and saturation po-  
271 tentials of electron flux compared to *G. sulfurreducens* (Figure 2B). Single-turnover cyclic volt-  
272 ammetry resolved two major redox processes centered at  $-0.136$  and  $-0.070$  V vs. SHE, similar  
273 to other *Geobacter* biofilms where reversible oxidation/reduction midpoint potentials are slightly  
274 more negative than catalytic turnover voltammetry (Strycharz-Glaven and Tender, 2012; Marsili  
275 et al., 2010).

276  
277 Electrochemical data showing a shift in the catalytic wave towards more positive redox  
278 potential suggested that *D. soudanensis* may be adapted to harvest energy from extracellular ac-  
279 ceptors with higher redox potentials than those typically encountered by other bacteria previous-  
280 ly characterized on electrodes. In experiments with insoluble Fe(III)-oxides, Fe(II) accumulation

## Isolation and complete genome of *Desulfuromonas soudanensis*

281 increased exponentially with a doubling time of  $12.7 \pm 1.1$  h ( $n = 6$ ) when freshly prepared  
282 schwertmannite, an acceptor with a predicted midpoint potential near +0.1 V SHE was provided  
283 (Thamdrup, 2000). Poorly crystalline Fe(III) oxide, predicted to have a redox potential near or  
284 below 0 V, supported a slower Fe(II) accumulation rate ( $15.7 \pm 1.0$  h,  $n = 3$ ) (Figure 3B). With  
285 soluble acceptors, *D. soudanensis* showed poor Fe(III) reduction in ferric citrate medium, and  
286 growth slowed after accumulation of >3 mM Fe(II) (Figure 3C). With fumarate as the electron  
287 acceptor, cells grew exponentially, demonstrating a maximum doubling time of  $13.3 \pm 0.6$  h ( $n =$   
288 3) when acetate was the electron donor, and fumarate fermentation was observed in donor-free  
289 controls (Figure 3D).

290  
291 **Genomic features.** *D. soudanensis* contains a single 3,958-620-bp circular chromosome  
292 (Figure 4A) with similar G+C content (61.19%) to other *Desulfuromonas* spp., and represents  
293 the first complete *Desulfuromonas* genome. The genome encodes 3,419 protein-coding genes, 46  
294 pseudogenes, 55 tRNAs, and 4 RNA polymerase sigma factors, and includes an exact tandem  
295 duplication of the 16S-5S-23S rRNA operon. Genes for assimilatory sulfate reduction, respirato-  
296 ry/dissimilatory nitrate reduction to ammonia, and N<sub>2</sub> fixation are present, and *D. soudanensis*  
297 appears prototrophic for all amino acids, vitamins, and cofactors. Central metabolism in *D. sou-*  
298 *danensis* includes a non-oxidative pentose phosphate pathway and Embden-Meyerhof-Parnas  
299 glycolysis/gluconeogenesis, linked by at least two putative pyruvate:ferredoxin oxidoreductases  
300 and one pyruvate dehydrogenase to a complete TCA cycle that includes the eukaryotic-like cit-  
301 rate synthase characteristic of other *Geobacter* and *Desulfuromonas* strains (Bond et al., 2005).

302  
303 The *D. soudanensis* genome is dense with chemosensory and regulatory features, includ-  
304 ing 68 two-component histidine kinases, 97 transcriptional response regulators, 15 methyl-  
305 accepting chemotaxis proteins, 27 putative diguanylate cyclases and 16 predicted GEMM *cis-*  
306 regulatory cyclic di-GMP (or cyclic AMP-GMP) riboswitches. Among these, DSODU\_1479  
307 bears highest identity (45%) to a recently reported diguanylate cyclase that produces c-AMP-  
308 GMP in *G. sulfurreducens* (Hallberg et al., 2016). Genes linked to growth in a metal-rich envi-  
309 ronment were also prevalent, such as an *hcgAB* gene cluster encoding mercury methylation  
310 (DSODU\_2468-2469; Parks et al., 2013), a Czc cobalt-zinc-cadmium exporter (DSODU\_2899-  
311 2901), CopA-family copper resistance system (DSODU\_1515-1516), and a cluster containing a  
312 glutaredoxin-dependent arsenate reductase, arsenite transporter, and an ArsR-family repressor  
313 (DSODU\_3330-3333).

314  
315 A region encoding a LuxI-like acyl homoserine lactone synthase and a LuxR family tran-  
316 scriptional regulator is present in the vicinity of the encoded ImcH and CbcL homologs (Figure  
317 4A), suggesting possible quorum-sensing abilities in this organism. Because production of AHL  
318 has never been described for any metal-reducing *Desulfuromonas* or *Geobacter* isolate, *D. sou-*  
319 *danensis* was cultivated to ~0.5 OD<sub>600</sub>, cell-free supernatants were extracted with ethyl acetate,  
320 and dried extracts were resuspended in water. Extracts prepared from *D. soudanensis* cultures  
321 produced positive results for AHL-like compounds, using an indicator *Agrobacterium* strain  
322 (Zhu et al., 2003). Protein-normalized levels of beta-galactosidase activity resulting from addi-  
323 tion of the *D. soudanensis* AHL were similar to positive control containing 10 nM *N*-3-  
324 oxohexanoyl-L-homoserine lactone, while an AHL-free control showed no activity (Figure 4C).

325  
326 ***D. soudanensis* carries a focused repertoire of multiheme cytochromes.** *D. soudanen-*  
327 *sis* possesses 38 putative multiheme *c*-type cytochromes (3 or more Cxx(x)CH heme-binding

## Isolation and complete genome of *Desulfuromonas soudanensis*

328 motifs), a value about half of what is typically seen in *Geobacter* strains. Two of these proteins  
329 are homologs to inner membrane cytochromes ImcH and CbcL of *G. sulfurreducens*  
330 (DSOUD\_0207 and DSOUD\_0214; 39% and 71% BLAST identity, respectively), which have  
331 been implicated in transfer of electrons out of the quinone pool and into the periplasm (Levar et  
332 al., 2014; Zacharoff et al., 2016). Two inner membrane cytochromes were components of a puta-  
333 tive NrfH/NrfA nitrite-to-ammonia respiration pathway. While most *Geobacter* species contain  
334 three to five triheme PpcA-like periplasmic cytochromes, only one (DSOUD\_3086) was present  
335 in *D. soudanensis*. Only two outer membrane ‘conduit’ clusters consisting of multiheme cyto-  
336 chromes, lipoprotein cytochromes, and putative  $\beta$ -barrel proteins were identified  
337 (DSOUD\_0702-0705, DSOUD\_2909-2915), comprising 7 cytochromes. At least 4 cytochromes  
338 were predicted to have extracellular localization, and one of these (DSOUD\_0664) contains 69  
339 heme-binding motifs. One-third of the putative multiheme cytochromes identified in *D. sou-*  
340 *danensis* had no obvious homologs in available databases, even when a recently obtained ge-  
341 nome sequence was included (‘*Ca. D. biiwaabikowi*’; Badalamenti et al., in prep).

342  
343 Bioinformatic predictions using VirSorter (Roux et al., 2015) and phiSpy (Akhter et al.,  
344 2012) identified a region of the *D. soudanensis* genome bearing viral signatures such as a phage-  
345 like repressor and integrases, along with sheath, tail, and baseplate proteins. Within this predict-  
346 ed prophage genome, a large number of predicted horizontally transferred genes were present,  
347 and these were predicted to encode a triheme cytochrome, an 11-heme predicted lipoprotein cy-  
348 tochrome, and an MtrC family decaheme cytochrome (Figure 4B).

349  
350 **Electrodes confirm genomic predictions for substrate utilization.** When biofilms  
351 were starved and washed free of exogenous acetate, the real-time response to addition of various  
352 electron donors could be used as an indicator of the ability of *D. soudanensis* to metabolize that  
353 compound. Current increased immediately upon additions of lactate, ethanol, or pyruvate (Figure  
354 5), consistent with genomic predictions for lactate dehydrogenase (DSOUD\_0819), alcohol de-  
355 hydrogenase (DSOUD\_1067 and DSOUD\_1075), and multiple mechanisms feeding pyruvate  
356 into the TCA cycle.  $H_2$  injected into the reactor phase also caused an increase in current (data not  
357 shown), in agreement with multiple [Ni-Fe] uptake hydrogenases encoded on the genome. In  
358 contrast, no electrochemical response was observed for methanol, glycerol, or glucose (Figure 5),  
359 agreeing with the lack of genes for activation, catabolism, and/or membrane transport of these  
360 substrates. Other substrates, including formate, citrate, succinate, propionate, butyrate, and ben-  
361 zoate were tested but failed to elicit a respiratory response within 30 min.

## 362 363 **DISCUSSION**

364  
365 By first enriching bacteria using anodes placed directly in anoxic Soudan Iron Mine borehole  
366 brine fluids, this study was able to isolate *D. soudanensis* WTL, a new metal- and electrode-  
367 respiring bacterium. In contrast, parallel attempts to directly inoculate laboratory reactors with  
368 borehole fluid samples consistently failed to obtain positive enrichments. As DNA surveys esti-  
369 mate *D. soudanensis* is present as less than 0.02% of organisms in borehole fluids, it is likely that  
370 samples from this  $\sim 10^3$  cell/ml environment contain, at best, a few *D. soudanensis* cells, even if  
371 they are concentrated via filtration. The rarity of this organism underscores the value of a narrow  
372 bottleneck such as that created by an electrode, which provides a consistent electron sink to sup-  
373 port multiple doublings and increase cell numbers *in situ*.

374



## Isolation and complete genome of *Desulfuromonas soudanensis*

375 Electrodes also enable real-time measurements of respiration rates in response to envi-  
376 ronmental or electrochemical perturbations, and this allowed screening a panel of utilizable elec-  
377 tron donors (Figure 5) as well as surveying the redox potentials supporting extracellular respira-  
378 tion. The higher redox potential preferred by *D. soudanensis* (Figure 2B) is unique from charac-  
379 terized *Geobacter* strains, and provides evidence that the electron acceptor supporting growth of  
380 this organism in the environment is also different from what supports better-characterized fresh-  
381 water isolates. *D. soudanensis* does have genes for the same inner membrane cytochromes  
382 (ImcH and CbcL) implicated in setting the redox potential preferences of *G. sulfurreducens*, rais-  
383 ing the question of whether these cytochromes have altered redox potential windows, or if addi-  
384 tional mechanisms exist (Levar et al., 2014; Zacharoff et al., 2016). Based on the recent observa-  
385 tion that growth of thick multilayer biofilms on electrodes is correlated with the ability to form  
386 syntrophic associations with other bacteria (such as methanogens; Rotaru et al., 2015), the thin  
387 biofilms of *D. soudanensis* suggest a more isolated lifestyle.

388  
389 Long read DNA sequencing has enabled cost-effective reconstruction of complete, refer-  
390 ence-quality microbial genomes (Koren and Phillippy, 2015; Koren et al., 2013), even in this  
391 case where *D. soudanensis* possessed a tandem 16S-5S-23S rRNA operon duplication, as well as  
392 repetitive transposases, integrases, and recombinases (Figure 4A, internal links). The *D. sou-*  
393 *danensis* genome represents the first complete genome from the *Desulfuromonas* genus, despite  
394 the type strain, *D. acetoxidans* DSM 684, having been first reported 40 years ago (Pfennig and  
395 Biebl, 1976). 278 proteins encoded in the *D. soudanensis* genome have no clear homologs  
396 (>30% threshold) in other metal-reducing *Deltaproteobacteria*, and among the 127 of these pro-  
397 teins with predicted functional annotation, a LuxI family *N*-acyl homoserine lactone synthase  
398 bearing only 24% BLAST identity to *G. uraniiireducens* was identified. As *D. soudanensis* pro-  
399 duces AHL-like compounds *in vivo* (Figure 4C), this finding suggests a previously undocument-  
400 ed role for quorum sensing in the broader context of *Deltaproteobacteria*, even in organic carbon-  
401 limited subsurface environments, where even small aggregates of *D. soudanensis* may need to  
402 respond to changes in flow rates or environmental conditions (Connell et al., 2010).

403  
404 Though *D. soudanensis* only encodes roughly half as many *c*-type cytochromes as fresh-  
405 water *Geobacter* spp., 11 of its 38 cytochromes are unique among known *Deltaproteobacteria*.  
406 Poor genomic conservation of outer surface cytochromes was first recognized ten years ago  
407 (Butler et al., 2010) and remains a pervasive pattern among metal-reducing bacteria in general.  
408 One hypothesis suggested by the *D. soudanensis* genome is that phage-mediated horizontal gene  
409 transfer contributes to cytochrome diversity. The closest homolog to the 11-heme cytochrome  
410 predicted to lie within a prophage (Figure 4B) is another cytochrome (33% amino acid identity)  
411 from *Geopsychrobacter electrophilus*, an organism isolated from a marine sediment fuel cell  
412 in New Jersey, USA (Holmes et al., 2004a). When we analyzed all available metal-reducing  
413 *Deltaproteobacterial* genomes for viral signatures, *Gps. electrophilus* was the only other ge-  
414 nome that contained a cytochrome located within a putative prophage. Remarkably, both the cy-  
415 tochrome and prophage are different than those of *D. soudanensis*. Taken together, these find-  
416 ings suggest that viral transfer of cytochrome genes may be accelerating exchange of these cyto-  
417 chromes between metal-reducing bacteria. However, until phage particles can be recovered from  
418 these organisms, this remains a speculation.

419  
420 The taxonomy of metal-reducing *Deltaproteobacteria* is still being resolved, particularly  
421 among isolates recovered from marine environments. While freshwater isolates are consistently

## Isolation and complete genome of *Desulfuromonas soudanensis*

422 named as *Geobacter* spp., marine isolates are often given genus designations that reflect isolation  
423 or enrichment conditions. Holmes et al. (Holmes et al., 2004b) proposed the family *Geobacter-*  
424 *aceae* to include *Geobacter*, *Desulfuromonas*, *Desulfuromusa*, *Pelobacter*, and *Malonomonas*.  
425 Kuever et al. (2005; corrig. 2006) described two family names with standing for classification in  
426 Bergey's Manual, originally placing *Geobacter*, *Geoalkalibacter*, *Geothermobacter*, and *Geo-*  
427 *psychrobacter* in the *Geobacteraceae* family, and assigning all other genera to the *Desulfu-*  
428 *romonadaceae* family, based on designation of *D. acetoxidans* as the type strain (Pfennig and  
429 Biebl, 1976). Phylogenomic analysis supports an early evolutionary divergence between fresh-  
430 water and marine strains (Figure 6), with 26 sequenced genomes separated into two distinct  
431 clades. Notably, this separation also tracks with per-genome cytochrome abundance, where  
432 freshwater strains contain much higher multiheme cytochrome content.

433  
434 Based on whole-genome phylogeny, *D. soudanensis* falls into a clade with *Desulfuromo-*  
435 *nas* sp. TF (isolated using an electrode as the electron acceptor) and 'Ca. *Desulfuromonas*  
436 *biiwaabikowi* DDH964' a genome recovered from another Soudan electrode enrichment (NCBI  
437 BioProject Accession PRJNA316855; Badalamenti et al., in prep.). While this clade contains  
438 bacteria isolated from highly saline and subsurface sites, they are phylogenetically distinct from  
439 the two known halophilic *Geoalkalibacter* spp. (Greene et al., 2009; Zavarzina et al., 2006). The  
440 fact that each new metal-reducing isolate within this class shares a similar core anaerobic physi-  
441 ology, yet contains a highly variable collection of redox and sensory proteins suggests that many  
442 environmental niches defined by salinity, pH, and mineralogy are driving evolution and diver-  
443 gence within the *Geobacter-Desulfuromonas* cluster. Continued efforts to recover isolates and  
444 genomes from a wide diversity of habitats, using surfaces such as electrodes to target specific  
445 abilities, will aid in understanding the extent of this diversity.

446  
447 **FUNDING**  
448 This work was supported by the Minnesota Environment and Natural Resources Trust Fund  
449 grant 089-E2.

450  
451 **ACKNOWLEDGMENTS**  
452 We thank the Minnesota Department of Natural Resources and Jim Essig, Soudan Mine Under-  
453 ground State Park Manager, for providing logistical support during sampling trips. We thank  
454 Vuong Nguyen for performing the AHL LacZ activity assays. We also thank Karl Oles (Mayo  
455 Clinic Bioinformatics Core) for performing PacBio sequencing, and the Minnesota Supercompu-  
456 ting Institute for providing high-performance computing resources to support PacBio genome  
457 assembly and bioinformatics analyses.

458  
459 **CONFLICT OF INTEREST STATEMENT**  
460 The authors declare no conflict of interest.

461  
462  
463  
464  
465  
466  
467  
468

## Isolation and complete genome of *Desulfuromonas soudanensis*

### 469 REFERENCES

- 470 Akhter, S., Aziz, R. K., and Edwards, R. A. (2012). PhiSpy: a novel algorithm for finding pro-  
471 phages in bacterial genomes that combines similarity- and composition-based strategies. *Nu-  
472 cleic Acids Res* 40, e126–e126. doi:10.1093/nar/gks406.
- 473 An, T. T., and Picardal, F. W. (2015). *Desulfuromonas carbonis* sp. nov., an Fe(III)-, S<sup>0</sup>- and  
474 Mn(IV)-reducing bacterium isolated from an active coalbed methane gas well. *Int J Syst  
475 Evol Micr* 65, 1686–1693. doi:10.1099/ij.s.0.000159.
- 476 Bartram, A. K., Lynch, M. D. J., Stearns, J. C., Moreno-Hagelsieb, G., and Neufeld, J. D. (2011).  
477 Generation of multimillion-sequence 16S rRNA gene libraries from complex microbial  
478 communities by assembling paired-end Illumina reads. *Appl Env Microbiol* 77, 3846–3852.  
479 doi:10.1128/AEM.02772-10.
- 480 Bond, D. R., Holmes, D. E., Tender, L. M., and Lovley, D. R. (2002). Electrode-reducing micro-  
481 organisms that harvest energy from marine sediments. *Science* 295, 483–485.  
482 doi:10.1126/science.1066771.
- 483 Bond, D. R., Mester, T., Nesbø, C. L., Izquierdo-Lopez, A. V., Collart, F. L., and Lovley, D. R.  
484 (2005). Characterization of citrate synthase from *Geobacter sulfurreducens* and evidence for  
485 a family of citrate synthases similar to those of eukaryotes throughout the *Geobacteraceae*.  
486 *Appl Env Microbiol* 71, 3858–3865. doi:10.1128/AEM.71.7.3858-3865.2005.
- 487 Bonis, B. M., and Gralnick, J. A. (2015). *Marinobacter subterrani*, a genetically tractable neu-  
488 trophilic Fe(II)-oxidizing strain isolated from the Soudan Iron Mine. *Front Microbiol* 6, 719.  
489 doi:10.3389/fmicb.2015.00719.
- 490 Butler, J. E., Young, N. D., and Lovley, D. R. (2010). Evolution of electron transfer out of the  
491 cell: comparative genomics of six *Geobacter* genomes. *BMC Genomics* 11, 40.  
492 doi:10.1186/1471-2164-11-40.
- 493 Chan, C. H., Levar, C. E., Zacharoff, L., Badalamenti, J. P., and Bond, D. R. (2015). Scarless  
494 genome editing and stable inducible expression vectors for *Geobacter sulfurreducens*. *Appl  
495 Env Microbiol* 81, 7178–7186. doi:10.1128/AEM.01967-15.
- 496 Chin, C.-S., Alexander, D. H., Marks, P., Klammer, A. A., Drake, J., Heiner, C., et al. (2013).  
497 Nonhybrid, finished microbial genome assemblies from long-read SMRT sequencing data.  
498 *Nat Meth* 10, 563–569. doi:10.1038/nmeth.2474.
- 499 Connell, J. L., Wessel, A. K., Parsek, M. R., Ellington, A. D., Whiteley, M., and Shear, J. B.  
500 (2010). Probing prokaryotic social behaviors with bacterial “lobster traps.” *mBio* 1, e00202–  
501 10–e00202–17. doi:10.1128/mBio.00202-10.
- 502 Contreras-Moreira, B., and Vinuesa, P. (2013). GET\_HOMOLOGUES, a versatile software  
503 package for scalable and robust microbial pangenome analysis. *Appl Env Microbiol* 79,  
504 7696–7701. doi:10.1128/AEM.02411-13.
- 505 Darling, A. E., Jospin, G., Lowe, E., Matsen, F. A., Bik, H. M., and Eisen, J. A. (2014). Phy-  
506 loSift: phylogenetic analysis of genomes and metagenomes. *PeerJ* 2, e243.  
507 doi:10.7717/peerj.243.
- 508 Deatherage, D. E., and Barrick, J. E. (2014). Identification of mutations in laboratory-evolved  
509 microbes from next-generation sequencing data using breseq. *Methods Mol. Biol* 1151, 165–  
510 188. doi:10.1007/978-1-4939-0554-6\_12.
- 511 Edwards, R. A., Rodriguez-Brito, B., Wegley, L., Haynes, M., Breitbart, M., Peterson, D. M., et  
512 al. (2006). Using pyrosequencing to shed light on deep mine microbial ecology. *BMC Ge-  
513 nomics* 7, 57. doi:10.1186/1471-2164-7-57.
- 514 Fu, Q., Kobayashi, H., Kawaguchi, H., Wakayama, T., Maeda, H., and Sato, K. (2013). A ther-  
515 mophilic Gram-negative nitrate-reducing bacterium, *Calditerrivibrio nitroreducens*, exhibit-

Isolation and complete genome of *Desulfuromonas soudanensis*

- 516 ing electricity generation capability. *Env Sci Tech* 47, 12583–12590. doi:10.1021/es402749f.
- 517 Gao, F., and Zhang, C.-T. (2008). Ori-Finder: a web-based system for finding oriCs in unanno-
- 518 tated bacterial genomes. *BMC Bioinformatics* 9, 79. doi:10.1186/1471-2105-9-79.
- 519 Greene, A. C., Patel, B. K. C., and Yacob, S. (2009). *Geoalkalibacter subterraneus* sp. nov., an
- 520 anaerobic Fe(III)- and Mn(IV)-reducing bacterium from a petroleum reservoir, and emended
- 521 descriptions of the family *Desulfuromonadaceae* and the genus *Geoalkalibacter*. *Int J Syst*
- 522 *Evol Micr* 59, 781–785. doi:10.1099/ij.s.0.001537-0.
- 523 Hallberg, Z. F., Wang, X. C., Wright, T. A., Nan, B., Ad, O., Yeo, J., et al. (2016). Hybrid pro-
- 524 miscuous (Hypr) GGDEF enzymes produce cyclic AMP-GMP (3′, 3′′cGAMP). *PNAS* 113,
- 525 1790–1795. doi:10.1073/pnas.1515287113.
- 526 Holmes, D. E., Nicoll, J. S., Bond, D. R., and Lovley, D. R. (2004a). Potential role of a novel
- 527 psychrotolerant member of the family *Geobacteraceae*, *Geopsychrobacter electrodiphilus*
- 528 gen. nov., sp. nov., in electricity production by a marine sediment fuel cell. *Appl Env Micro-*
- 529 *biol* 70, 6023–6030. doi:10.1128/AEM.70.10.6023-6030.2004.
- 530 Holmes, D., Nevin, K., and Lovley, D. (2004b). Comparison of 16S rRNA, *nifD*, *recA*, *gyrB*,
- 531 *rpoB* and *fusA* genes within the family *Geobacteraceae* fam. nov. *Int J Syst Evol Micr* 54,
- 532 1591–1599. doi:10.1099/ij.s.0.02958-0.
- 533 Koren, S., and Phillippy, A. M. (2015). One chromosome, one contig: complete microbial ge-
- 534 nomies from long-read sequencing and assembly. *Curr Op Microbiol* 23, 110–120.
- 535 doi:10.1016/j.mib.2014.11.014.
- 536 Koren, S., Harhay, G. P., Smith, T. P., Bono, J. L., Harhay, D. M., Mcvey, D. S., et al. (2013).
- 537 Reducing assembly complexity of microbial genomes with single-molecule sequencing. *Ge-*
- 538 *nome Biol* 14, R101. doi:10.1186/gb-2013-14-9-r101.
- 539 Krzywinski, M., Schein, J., Birol, I., Connors, J., Gascoyne, R., Horsman, D., et al. (2009). Cir-
- 540 cos: an information aesthetic for comparative genomics. *Genome Res* 19, 1639–1645.
- 541 doi:10.1101/gr.092759.109
- 542 Kuever, J., Rainey, F.A., and Widdel, F. (2005) Family I. Desulfuromonaceae fam. nov. (Desul-
- 543 furomonadaceae corrig. Kuever et al. 2006). In *Bergey's Manual of Systematic Bacteriology*,
- 544 2nd ed., p. 1006. New York: Springer.
- 545 Levar, C. E., Chan, C. H., Mehta-Kolte, M. G., and Bond, D. R. (2014). An inner membrane cy-
- 546 tochrome required only for reduction of high redox potential extracellular electron acceptors.
- 547 *mBio* 5, e02034–14. doi:10.1128/mBio.02034-14.
- 548 Marsili, E., Rollefson, J. B., Baron, D. B., Hozalski, R. M., and Bond, D. R. (2008). Microbial
- 549 biofilm voltammetry: Direct electrochemical characterization of catalytic electrode-attached
- 550 biofilms. *Appl Env Microbiol* 74, 7329–7337. doi:10.1128/AEM.00177-08.
- 551 Marsili, E., Sun, J., and Bond, D. R. (2010). Voltammetry and growth physiology of *Geobacter*
- 552 *sulfurreducens* biofilms as a function of growth stage and imposed electrode potential. *Elec-*
- 553 *troanal* 22, 865–874. doi:10.1002/elan.200800007.
- 554 Mehta-Kolte, M. G., and Bond, D. R. (2012). *Geothrix fermentans* secretes two different redox-
- 555 active compounds to utilize electron acceptors across a wide range of redox potentials. *Appl*
- 556 *Env Microbiol* 78, 6987–6995. doi:10.1128/AEM.01460-12.
- 557 Miceli, J. F., Parameswaran, P., Kang, D.-W., Krajmalnik-Brown, R., and Torres, C. I. (2012).
- 558 Enrichment and analysis of anode-respiring bacteria from diverse anaerobic inocula. *Env Sci*
- 559 *Tech* 46, 10349–10355. doi:10.1021/es301902h.
- 560 Ojakangas, R. W., Morey, G. B., and Southwick, D. L. (2001). Paleoproterozoic basin develop-
- 561 ment and sedimentation in the Lake Superior region, North America. *Sedimentary Geol* 141-
- 562 142, 319–341. doi:10.1016/S0037-0738(01)00081-1.



## Isolation and complete genome of *Desulfuromonas soudanensis*

- 563 Osborne, T. H., McArthur, J. M., Sikdar, P. K., and Santini, J. M. (2015). Isolation of an arse-  
564 nate-respiring bacterium from a redox front in an arsenic-polluted aquifer in West Bengal,  
565 Bengal Basin. *Env Sci Tech* 49, 4193–4199. doi:10.1021/es504707x.
- 566 Parks, J. M., Johs, A., Podar, M., Bridou, R., Hurt, R. A., Smith, S. D., et al. (2013). The genetic  
567 basis for bacterial mercury methylation. *Science* 339, 1332-1335.  
568 doi:10.1126/science.1230667.
- 569 Pfennig, N., and Biebl, H. (1976). *Desulfuromonas acetoxidans* gen. nov. and sp. nov., a new  
570 anaerobic, sulfur-reducing, acetate-oxidizing bacterium. *Arch Microbiol* 110, 3–12.  
571 doi:10.1007/BF00416962.
- 572 Rotaru, A.-E., Woodard, T. L., Nevin, K. P., and Lovley, D. R. (2015). Link between capacity  
573 for current production and syntrophic growth in *Geobacter* species. *Front Microbiol* 6, 121.  
574 doi:10.3389/fmicb.2015.00744.
- 575 Roux, S., Enault, F., Hurwitz, B. L., and Sullivan, M. B. (2015). VirSorter: mining viral signal  
576 from microbial genomic data. *PeerJ* 3, e985. doi:10.7717/peerj.985.
- 577 Schloss, P. D., Westcott, S. L., Ryabin, T., Hall, J. R., Hartmann, M., Hollister, E. B., et al.  
578 (2009). Introducing mothur: open-source, platform-independent, community-supported  
579 software for describing and comparing microbial communities. *Appl Env Microbiol* 75,  
580 7537–7541. doi:10.1128/AEM.01541-09.
- 581 Seemann, T. (2014). Prokka: rapid prokaryotic genome annotation. *Bioinformatics* 30, 2068–  
582 2069. doi:10.1093/bioinformatics/btu153.
- 583 Strycharz-Glaven, S. M. and Tender, L. M. (2012). Study of the mechanism of catalytic activity  
584 of *G. sulfurreducens* biofilm anodes during biofilm growth. *ChemSusChem* 5, 1106–1118.  
585 doi:10.1002/cssc.201100737
- 586 Sung, Y., Ritalahti, K. M., Sanford, R. A., Urbance, J. W., Flynn, S. J., Tiedje, J. M., et al.  
587 (2003). Characterization of two tetrachloroethene-reducing, acetate-oxidizing anaerobic bac-  
588 teria and their description as *Desulfuromonas michiganensis* sp. nov. *Appl Env Microbiol* 69,  
589 2964–2974. doi:10.1128/AEM.69.5.2964-2974.2003.
- 590 Thamdrup, B. (2000). “Bacterial manganese and iron reduction in aquatic sediments,” in *Ad-  
591 vances in Microbial Ecology* (Springer US), 41–84. doi:10.1007/978-1-4615-4187-5\_2.
- 592 Walker, B. J., Abeel, T., Shea, T., Priest, M., Abouelliel, A., Sakthikumar, S., et al. (2014). Pi-  
593 lon: an integrated tool for comprehensive microbial variant detection and genome assembly  
594 improvement. *PLoS ONE* 9, e112963. doi:10.1371/journal.pone.0112963.
- 595 Wrighton, K. C., Thrash, J. C., Melnyk, R. A., Bigi, J. P., Byrne-Bailey, K. G., Remis, J. P., et al.  
596 (2011). Evidence for direct electron transfer by a Gram-positive bacterium isolated from a  
597 microbial fuel cell. *Appl Env Microbiol* 77, 7633–7639. doi:10.1128/AEM.05365-11.
- 598 Zacharoff, L., Chan, C. H., and Bond, D. R. (2016). Reduction of low potential electron accep-  
599 tors requires the CbcL inner membrane cytochrome of *Geobacter sulfurreducens*. *Bioelec-  
600 trochemistry* 107, 7–13. doi:10.1016/j.bioelechem.2015.08.003.
- 601 Zavarzina, D. G., Kolganova, T. V., Boulygina, E. S., Kostrikina, N. A., Tourova, T. P., and  
602 Zavarzin, G. A. (2006). *Geoalkalibacter ferrihydriticus* gen. nov. sp. nov., the first al-  
603 kaliphilic representative of the family *Geobacteraceae*, isolated from a soda lake. *Microbiol*  
604 75, 673–682. doi:10.1134/S0026261706060099.
- 605 Zhu, J., Chai, Y., Zhong, Z., Li, S., and Winans, S. C. (2003). *Agrobacterium* bioassay strain for  
606 ultrasensitive detection of *N*-acylhomoserine lactone-type quorum-sensing molecules: detec-  
607 tion of autoinducers in *Mesorhizobium huakuii*. *Appl Env Microbiol* 69, 6949–6953.  
608 doi:10.1128/AEM.69.11.6949-6953.2003.
- 609

## Isolation and complete genome of *Desulfuromonas soudanensis*

### 610 **FIGURE LEGENDS**

611

612 **FIGURE 1. Electrodes for enriching novel metal reducers from the terrestrial deep sub-**  
613 **surface.** **A** - Map showing the location of the Soudan Underground Iron Mine within Minne-  
614 sota's Vermilion Range, approximately 30 km WSW of the town of Ely. **B** - Photograph of  
615 diamond drill hole (DDH) 944 located along the west tunnel of Level 27 (713 m depth below  
616 the surface). A white precipitate is visible coating the platinized carbon cathode. **C** - Sche-  
617 matic diagram of the electrode apparatus used for *in situ* enrichment. **D** - Chronoamperome-  
618 try of a potentiostatically controlled laboratory bioreactor inoculated with the anode from the  
619 *in situ* enrichment. Red arrows indicate addition of acetate following substrate depletion.

620

621 **FIGURE 2. Electrochemical characterization of pure cultures of *Desulfuromonas sou-***  
622 ***danensis* WTL.** **A** - Chronoamperometry of potentiostatically controlled acetate-fed 10-ml  
623 bioreactors (+0.24 V vs. SHE) containing a single 3 cm<sup>2</sup> graphite electrode. All electrode  
624 experiments were inoculated 1:2 with late log phase cultures pre-grown under electron ac-  
625 ceptor limitation. The red trace and pink area show the mean and standard deviation, respec-  
626 tively, of 6 independent biological replicates. Estimates of doubling time were calculated  
627 against the linear portion of the curve from 0.7 to 2 d. **B** - Comparison of low scan rate (1  
628 mV/s) cyclic voltammograms of *Geobacter sulfurreducens* (Chan et al., 2015; black trace)  
629 and *D. soudanensis* WTL (red trace). Current density on the *y*-axis is normalized against its  
630 maximum value for either organism. **C** - Baseline subtracted single-turnover cyclic voltam-  
631 mogram of an established *D. soudanensis* biofilm starved of acetate. Black squares denote  
632 the midpoint potentials of the two redox processes observed, and the inset shows the raw da-  
633 ta (red trace) and polynomial function (black trace) used for baseline subtraction.

634

635 **FIGURE 3. Iron reduction and growth of pure cultures of *Desulfuromonas soudanensis***  
636 **WTL on various electron acceptors with 20 mM acetate as the electron donor.** All plots  
637 are representative of three independent biological replicates. Accumulation of ferrous iron  
638 over time in incubations with either ~20 mM schwertmannite (**A**), ~100 mM iron oxide (**B**),  
639 or 55 mM ferric citrate (**C**). In all cases Fe reduction slowed once Fe(II) concentrations  
640 reached 10 mM regardless of available Fe(III). **D** - Growth comparison of *D. soudanensis*  
641 cultures grown either with acetate plus 40 mM fumarate (black trace) or fumarate only (red  
642 trace).

643

644 **FIGURE 4. Features of the complete genome of *Desulfuromonas soudanensis* WTL.** **A** -  
645 circular representation of the genome generated in Circos v. 0.64 (Krzywinski 2009). Rings  
646 are numbered moving from the outermost inward as follows: 1, location and locus tags of  
647 multiheme *c*-type cytochromes (red), rRNA operon duplication (green), and other features  
648 (blue); 2, putative sensor histidine kinases (red triangles) and response regulators (black cir-  
649 cles); 3, protein coding sequences colored by COG category; 4, locations of methylated  
650 DNA bases identified by PacBio sequencing on the plus (red) and minus (blue) strands; 5,  
651 regions of putative horizontal gene transfer as predicted in IMG/ER, where grey is closest  
652 BLAST homology to other *Deltaproteobacteria*; 6, mapped read coverage (range 200-700x);  
653 7, mapping positions of the longest reads in the PacBio dataset; 8, G+C skew in a 5-kbp  
654 windows; 9, G+C content (blue >50%; maroon <50%); 10, putative viral protein coding  
655 genes; 11, links showing repetitive sequence at 95% identity (grey, >500 bp; red, > 2 kbp).

656 **B** - Zoomed region of the area highlighted in pink in Panel A showing the location of a puta-

## Isolation and complete genome of *Desulfuromonas soudanensis*

657 tive prophage integrated into the *D. soudanensis* genome. C – Concentrated ethyl acetate ex-  
658 tract of *D. soudanensis* supernatant triggers LacZ activity in an acyl-L-homoserine lactone  
659 indicator *Agrobacterium tumefaciens* strain (Zhu et al., 2003). LacZ activity in this strain is  
660 compared to a negative control (water) and to a positive control containing 10 nM authentic  
661 *N*-3-oxohexanoyl-L-homoserine lactone. Specific activity =  $\Delta A_{420}/\mu\text{g protein}$ .  
662

663 **FIGURE 5. Respiratory responses of starved, pre-established *Desulfuromonas soudanensis***  
664 **WTL biofilms to addition of various electron donors.** All compounds were added to a fi-  
665 nal concentration of 5 mM except glucose (2 mM) into electrode bioreactors that were con-  
666 stantly poised at +0.24 V vs. SHE.  
667

668 **FIGURE 6. Outgroup-rooted phylogenetic tree of *Geobacteraceae* and *Desulfuromona-***  
669 ***daceae* family members with sequenced genomes.** The tree was constructed from an  
670 alignment of a concatenated set of 40 conserved single-copy marker genes in PhyloSift. Col-  
671 ored backgrounds are shown to group coherent genera: pink - *Geobacter*, blue - *Geoalkali-*  
672 *bacter*, and green - *Desulfuromonas*. *D. soudanensis* WTL is shown in bold. Multiheme *c*-  
673 type cytochrome counts are shown in proportionally-sized circles. Genus abbreviations: *D.* -  
674 *Desulfuromonas*, *Dsa.* - *Desulfuromusa*, *G.* - *Geobacter*, *Glk.* - *Geoalkalibacter*, *Gps.* - *Geo-*  
675 *psychrobacter*, *P.* - *Pelobacter*.  
676

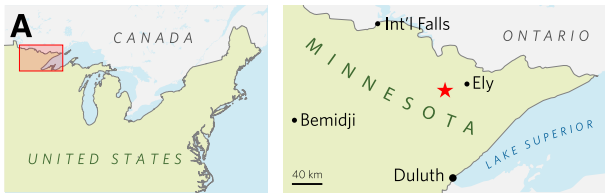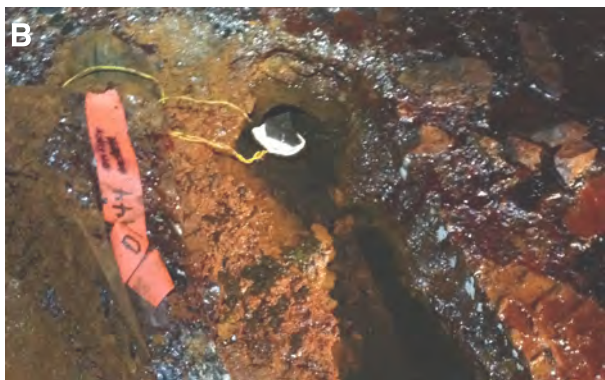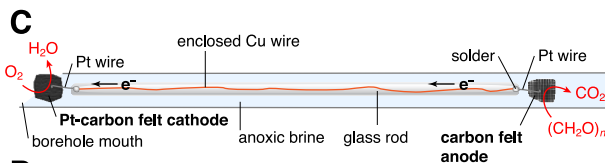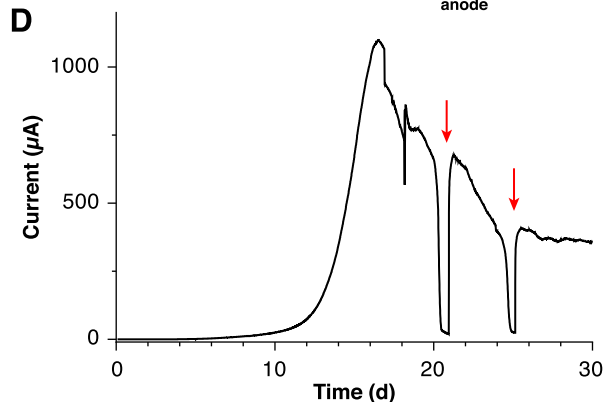

**FIGURE 1 | Electrodes for enriching novel metal reducers from the terrestrial deep subsurface. A** - Map showing the location of the Soudan Underground Iron Mine within Minnesota's Vermilion Range, approximately 30 km WSW of the town of Ely. **B** - Photograph of diamond drill hole (DDH) 944 located along the west tunnel of Level 27 (713 m depth below the surface). A white precipitate is visible coating the platinumized carbon cathode. **C** - Schematic diagram of the electrode apparatus used for *in situ* enrichment. **D** - Chronoamperometry of a potentiostatically controlled laboratory bioreactor inoculated with the anode from the *in situ* enrichment. Red arrows indicate addition of acetate following substrate depletion.



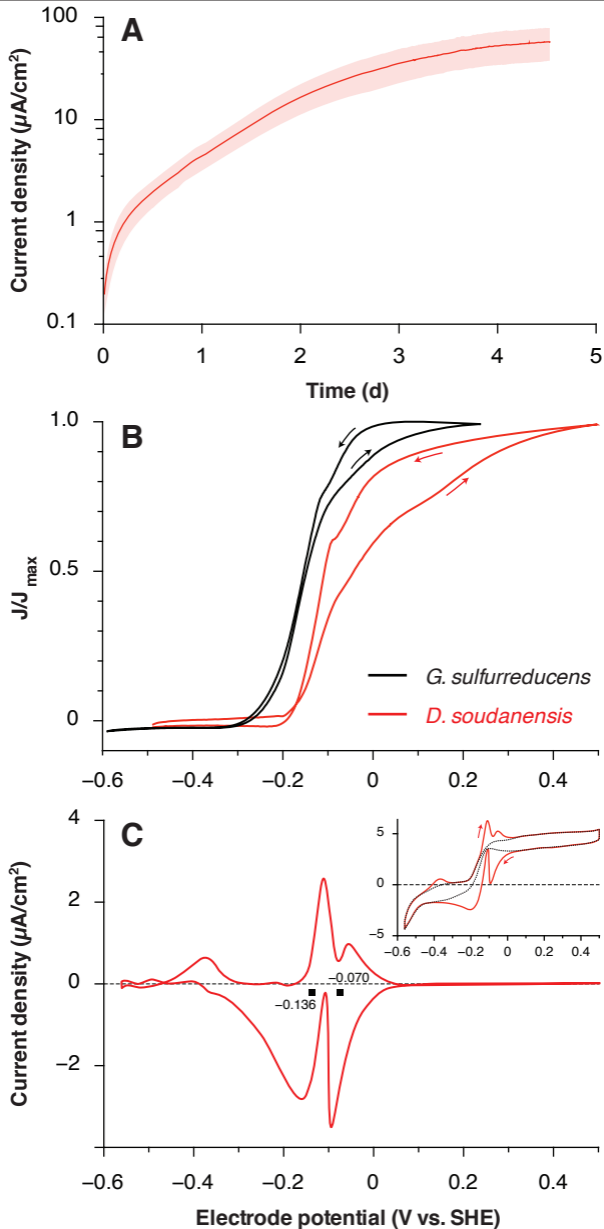

**FIGURE 2 | Electrochemical characterization of pure cultures of *Desulfuromonas soudanensis* WTL.** **A** - Chronoamperometry of potentiostatically controlled acetate-fed 10-ml bioreactors (+0.24 V vs. SHE) containing a single 3 cm<sup>2</sup> graphite electrode. All electrode experiments were inoculated 1:2 with late log phase cultures pre-grown under electron acceptor limitation. The red trace and pink area show the mean and standard deviation, respectively, of 6 independent biological replicates. Estimates of doubling time were calculated against the linear portion of the curve from 0.7 to 2 d. **B** - Comparison of low scan rate (1 mV/s) cyclic voltammograms of *Geobacter sulfurreducens* (Chan et al., 2015; black trace) and *D. soudanensis* WTL (red trace). Current density on the y-axis is normalized against its maximum value for either organism. **C** - Baseline subtracted single-turnover cyclic voltammogram of an established *D. soudanensis* WTL biofilm starved of acetate. Black squares denote the midpoint potentials of the two redox processes observed, and the inset shows the raw data (red trace) and polynomial function (black trace) used for baseline subtraction.

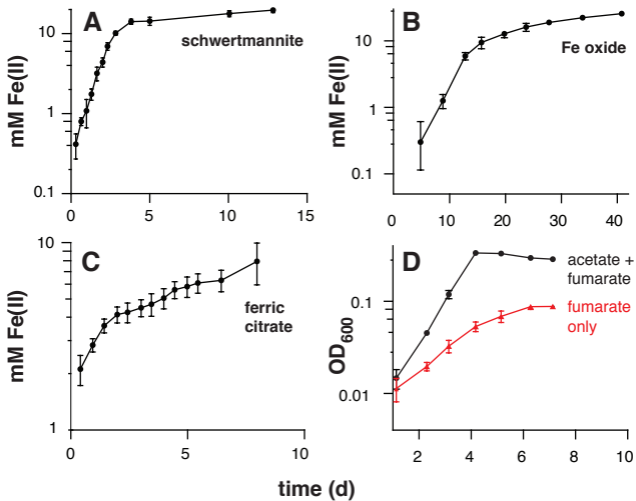

**FIGURE 3 | Iron reduction and growth of pure cultures of *Desulfuromonas sudanensis* WTL on various electron acceptors with 20 mM acetate as the electron donor.** All plots are representative of three independent biological replicates. Accumulation of ferrous iron over time in incubations with either ~20 mM schwertmannite (**A**), ~100 mM iron oxide (**B**), or 55 mM ferric citrate (**C**). In all cases Fe reduction slowed once Fe(II) concentrations reached 10 mM regardless of available Fe(III). **D** - Growth comparison of *D. sudanensis* WTL cultures grown either with acetate plus 40 mM fumarate (black trace) or fumarate only (red trace).

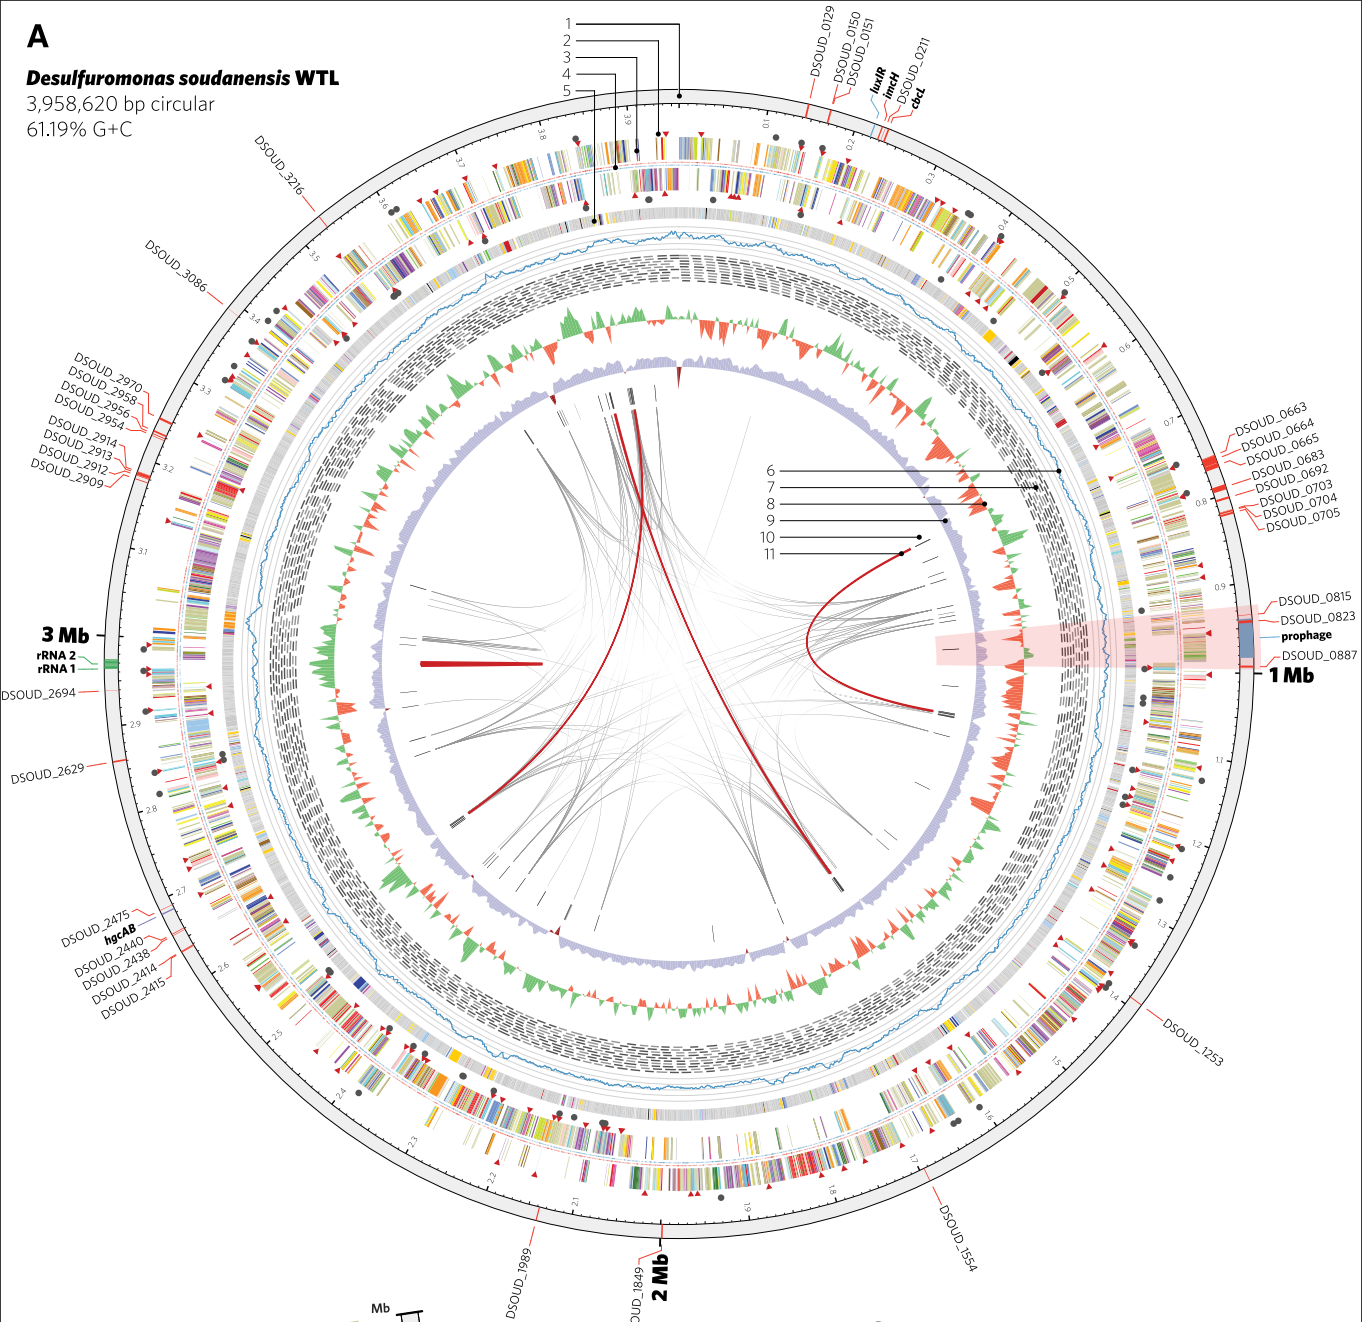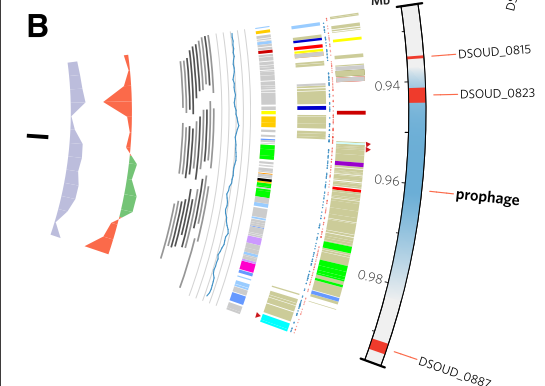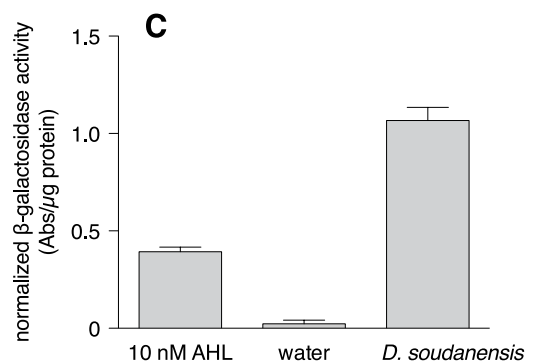

**FIGURE 4 | Features of the complete genome of *Desulfuromonas soudanensis* WTL.** **A** - circular representation of the genome generated in Circos v. 0.64 (Krzyszowski 2009). Rings are numbered moving from the outermost inward as follows: 1, location and locus tags of multi-heme  $\alpha$ -type cytochromes (red), rRNA operon duplication (green), and other features (blue); 2, putative sensor histidine kinases (red triangles) and response regulators (black circles); 3, protein coding sequences colored by COG category; 4, locations of methylated DNA bases identified by PacBio sequencing on the plus (red) and minus (blue) strands; 5, regions of putative horizontal gene transfer as predicted in IMG/ER, where grey is closest BLAST homology to other Deltaproteobacteria; 6, mapped read coverage (range 200-700x); 7, mapping positions of the longest reads in the PacBio dataset; 8, G+C skew in a 5-kbp windows; 9, G+C content (blue >50%; maroon <50%); 10, putative viral protein coding genes; 11, links showing repetitive sequence at 95% identity (grey, >500 bp; red, > 2 kbp). **B** - Zoomed region of the area highlighted in pink in Panel A showing the location of a putative prophage integrated into the *D. soudanensis* genome. **C** - Concentrated ethyl acetate extract of *D. soudanensis* supernatant triggers LacZ activity in an acyl-L-homoserine lactone indicator *Agrobacterium tumefaciens* strain (Zhu et al., 2003). LacZ activity in this strain is compared to a negative control (water) and to a positive control containing 10 nM authentic *N*-3-oxohexanoyl-L-homoserine lactone. Specific activity =  $\Delta A_{420}/\mu$ g protein.

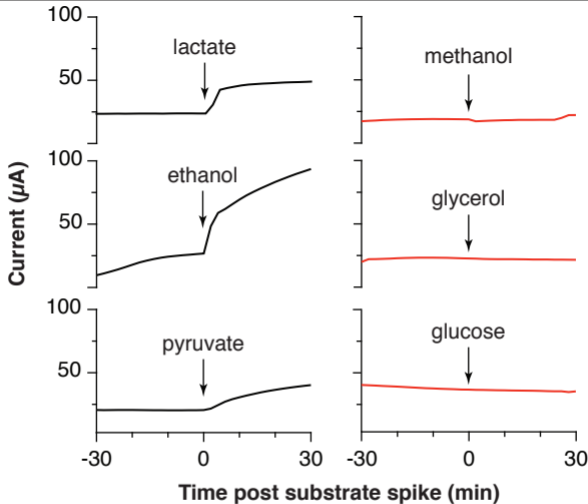

**FIGURE 5 | Respiratory responses of starved, pre-established *Desulfurmonas sudanensis* WTL biofilms to addition of various electron donors.** All compounds were added to a final concentration of 5 mM except glucose (2 mM) into electrode bioreactors that were constantly poised at +0.24 V vs. SHE.



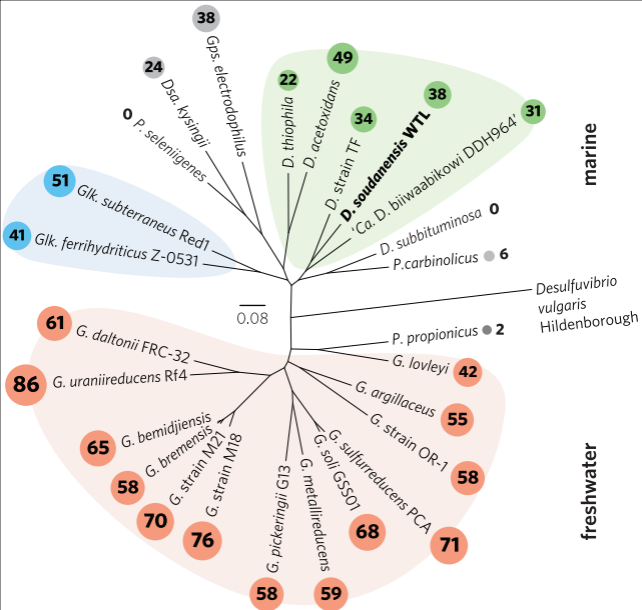

**FIGURE 6 | Outgroup-rooted phylogenetic tree of *Geobacteraceae* and *Desulfuromonadaceae* family members with sequenced genomes.**

The tree was constructed from an alignment of a concatenated set of 40 conserved single-copy marker genes in PhyloSift. Colored backgrounds are shown to group coherent genera: pink - *Geobacter*, blue - *Geoalkalibacter*, and green - *Desulfuromonas*. *D. soudanensis* WTL is shown in bold. Multiheme  $\alpha$ -type cytochrome counts are shown in proportionally-sized circles. Genus abbreviations: *D.* - *Desulfuromonas*, *Dsa.* - *Desulfuromusa*, *G.* - *Geobacter*, *Glk.* - *Geoalkalibacter*, *Gps.* - *Geopsychrobacter*, *P.* - *Pelobacter*.
